# Supplementary material
Source: PubMed Central journal article supplement (PMC5499128)

Figure S4. Number of common and unique markers (MAF>0) segregating in French and UK *C. gigas* population samples

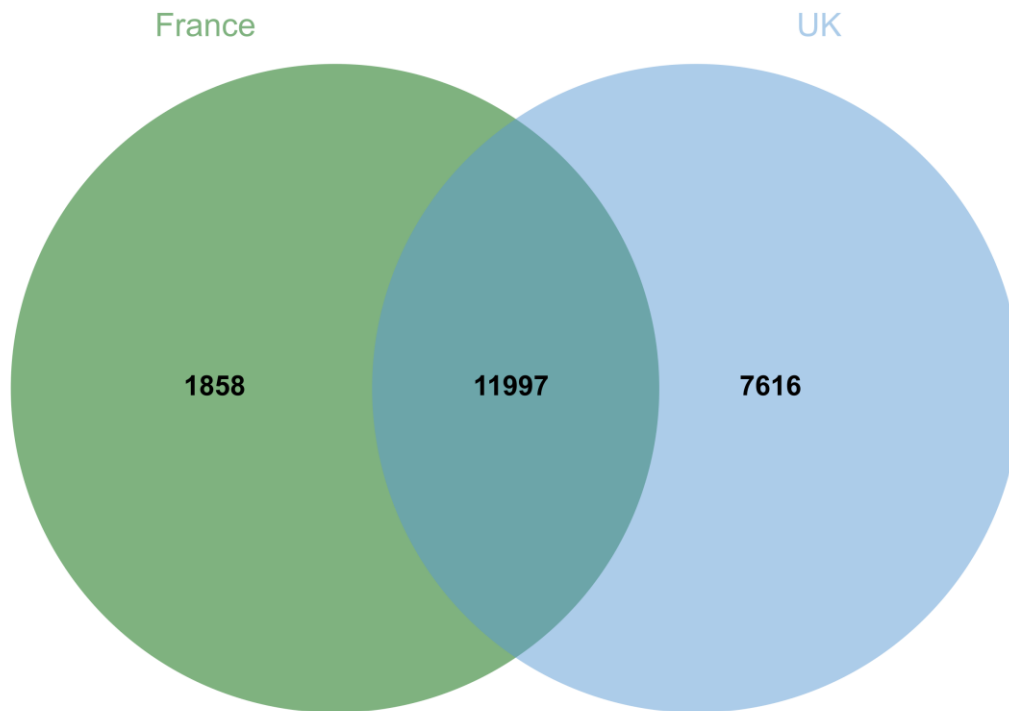

Supplement: 2209FigureS4.pdf [file 2209FigureS4.pdf]
