# Supplementary material
Source: PubMed Central journal article supplement (PMC5499128)

Figure S5. Minor Allele Frequency distribution of all polymorphic markers (MAF>0) in *C. gigas* populations

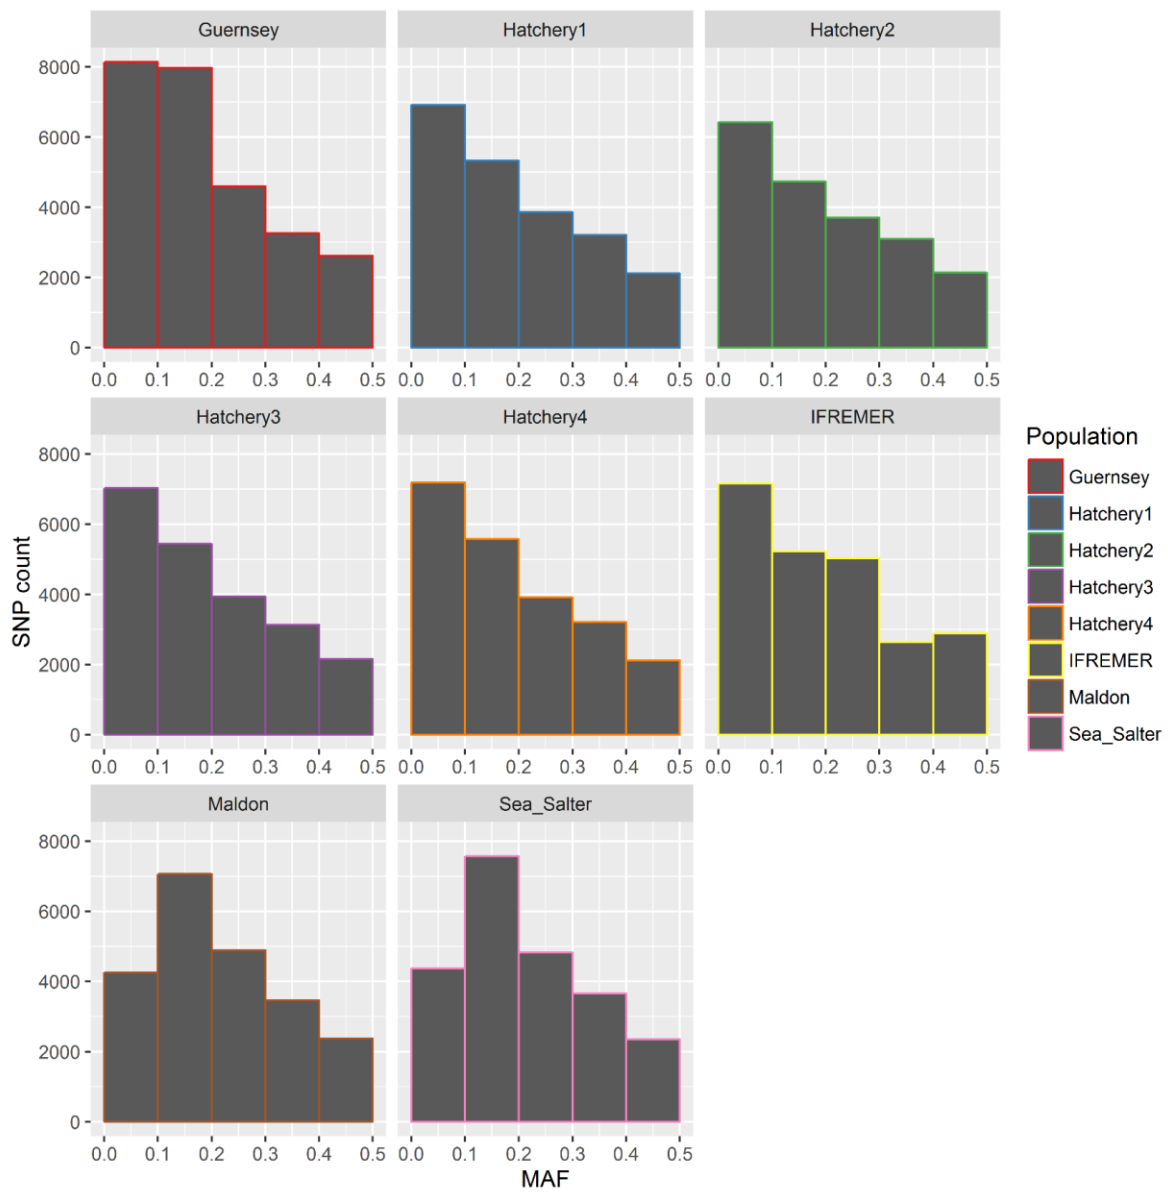

Supplement: 2209FigureS5.pdf [file 2209FigureS5.pdf]
