# Supplementary material
Source: PubMed Central journal article supplement (PMC5499128)
Supplement: 2209FigureS10.pdf [file 2209FigureS10.pdf]

Figure S10. Geographical distribution of *O. edulis* sampled populations

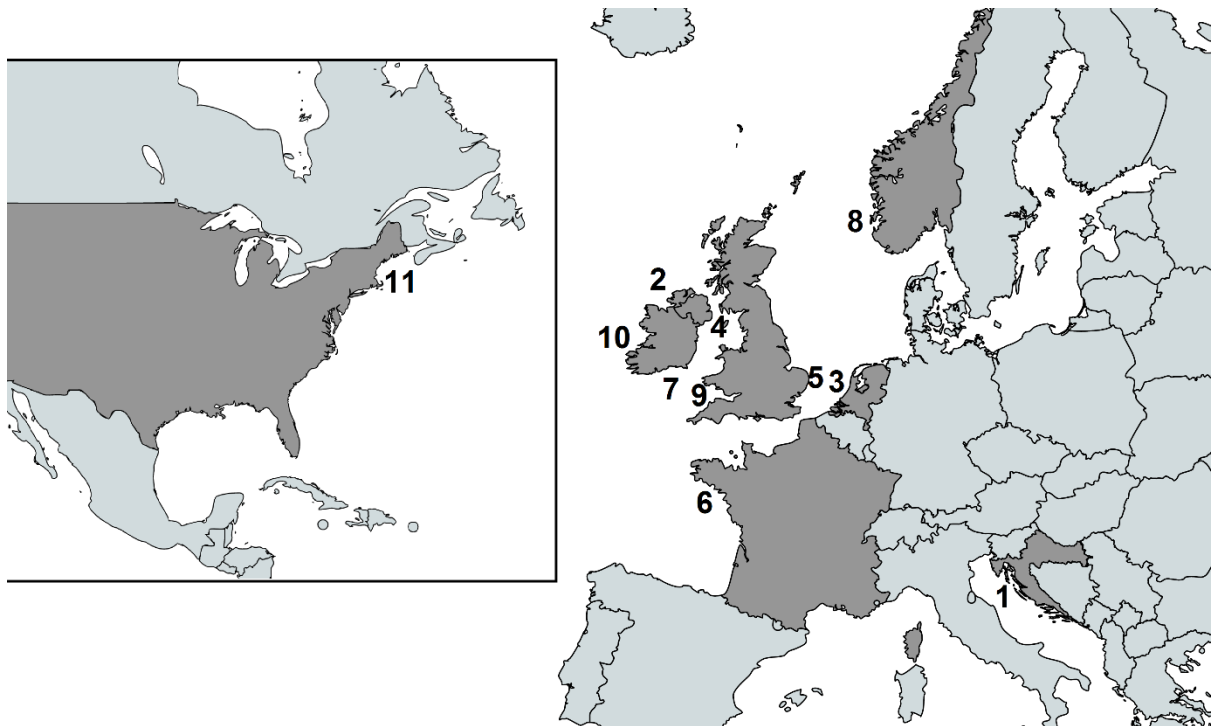

1. Croatia; 2. Foyle\_IRL; 3. Grevelingen\_NLD; 4. Larne\_NIRL; 5. Mersea\_UK; 6. Quiberon\_FR; 7. Rossmore\_IRL; 8. Sveio\_NOR; 9. Swansea\_UK; 10. Tralee\_IRL; 11. Maine\_USA.
