# Supplementary material
Source: PubMed Central journal article supplement (PMC5499128)

Figure S1. Proportion of polymorphic (MAF>0) and monomorphic SNPs in each of the *C.gigas* populations

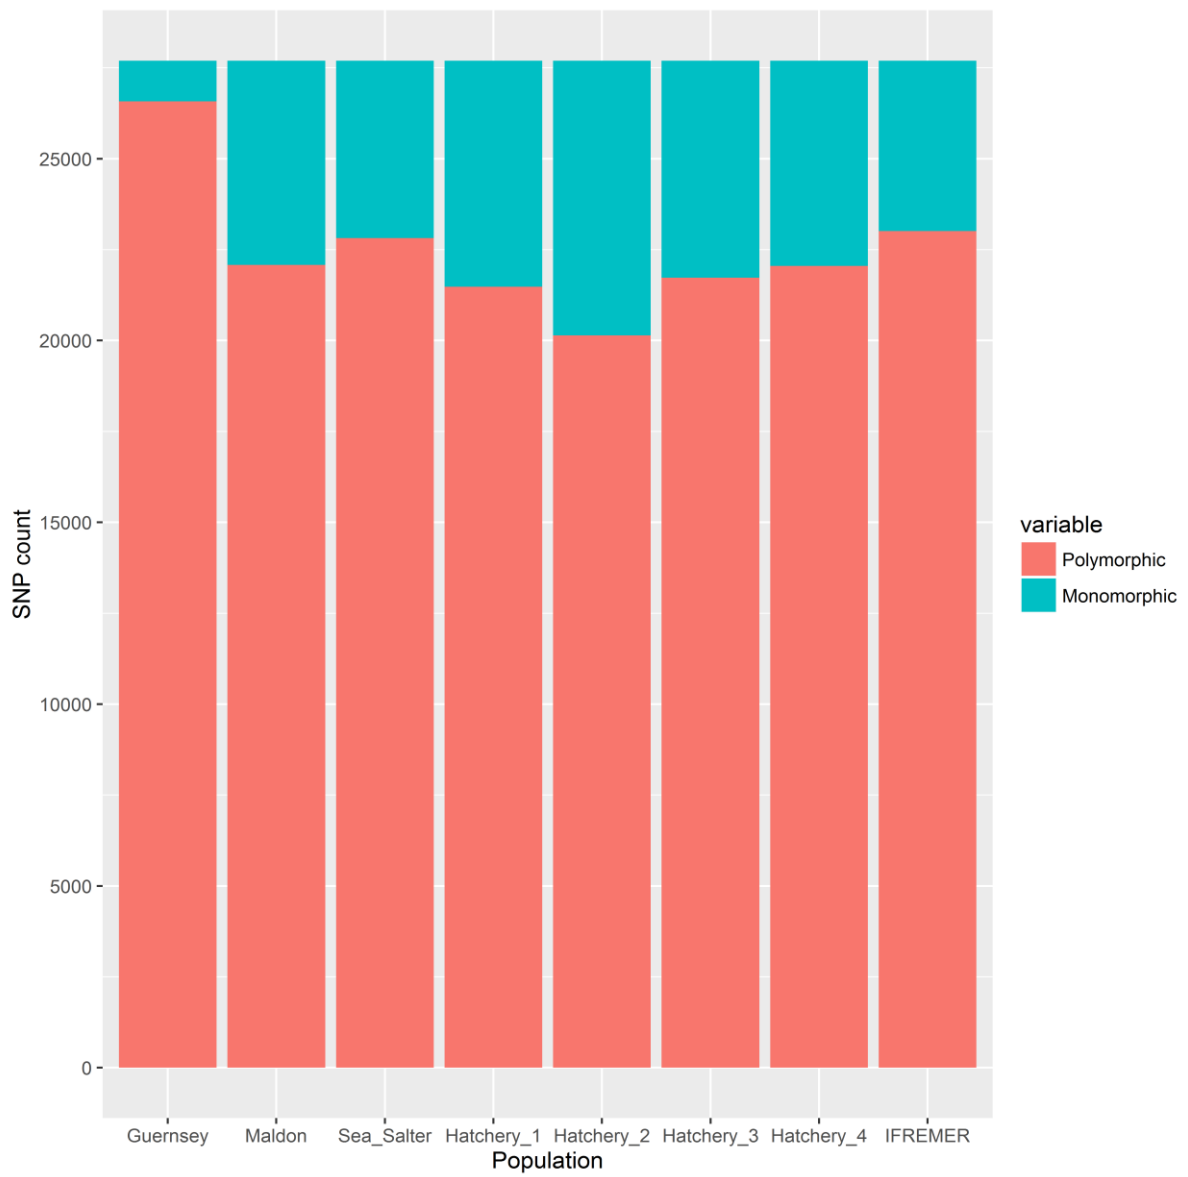

Supplement: 2209FigureS1.pdf [file 2209FigureS1.pdf]

Figure S2. Number of common and unique markers segregating (MAF>0) in *C. gigas* population from the UK

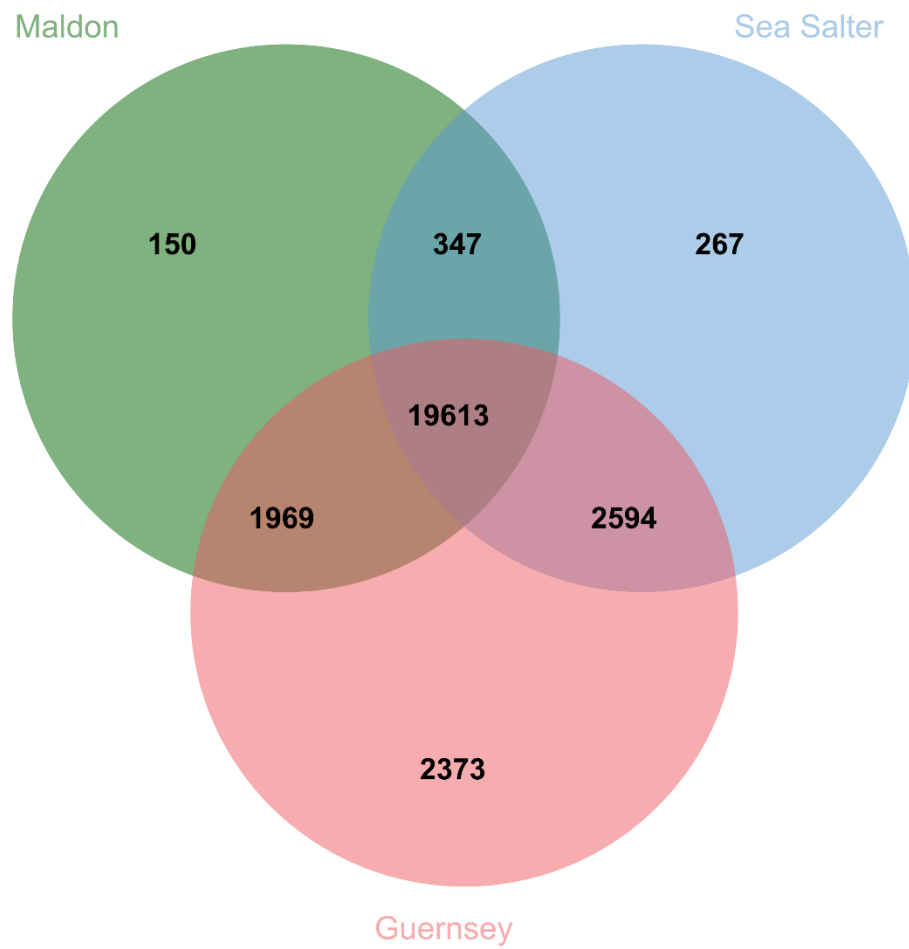

Supplement: 2209FigureS2.pdf [file 2209FigureS2.pdf]

Figure S3. Number of common and unique markers segregating (MAF>0) in *C. gigas* population from France

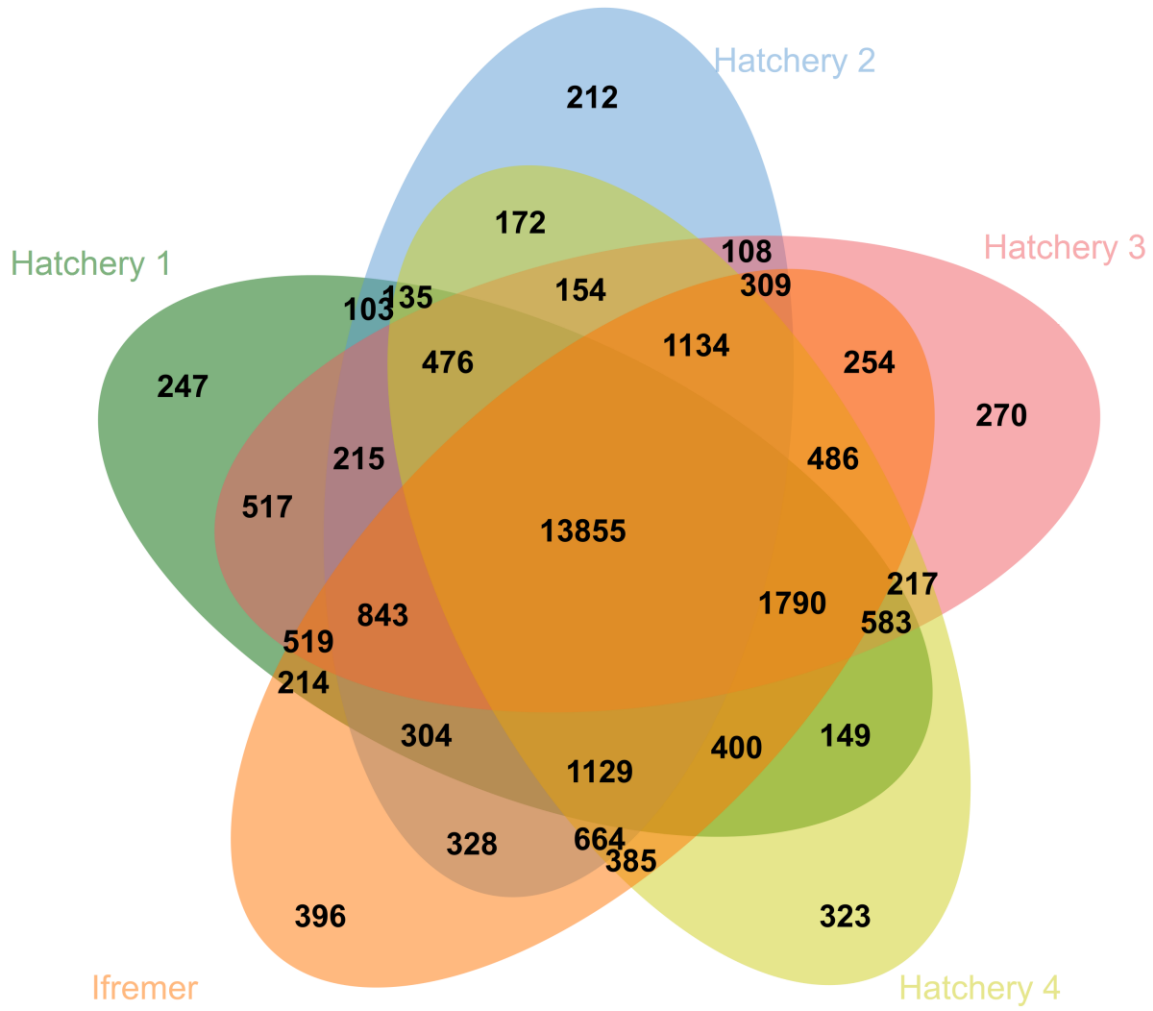

Supplement: 2209FigureS3.pdf [file 2209FigureS3.pdf]

Figure S6. Proportion of polymorphic and monomorphic (MAF>0) SNPs in *O. edulis* populations

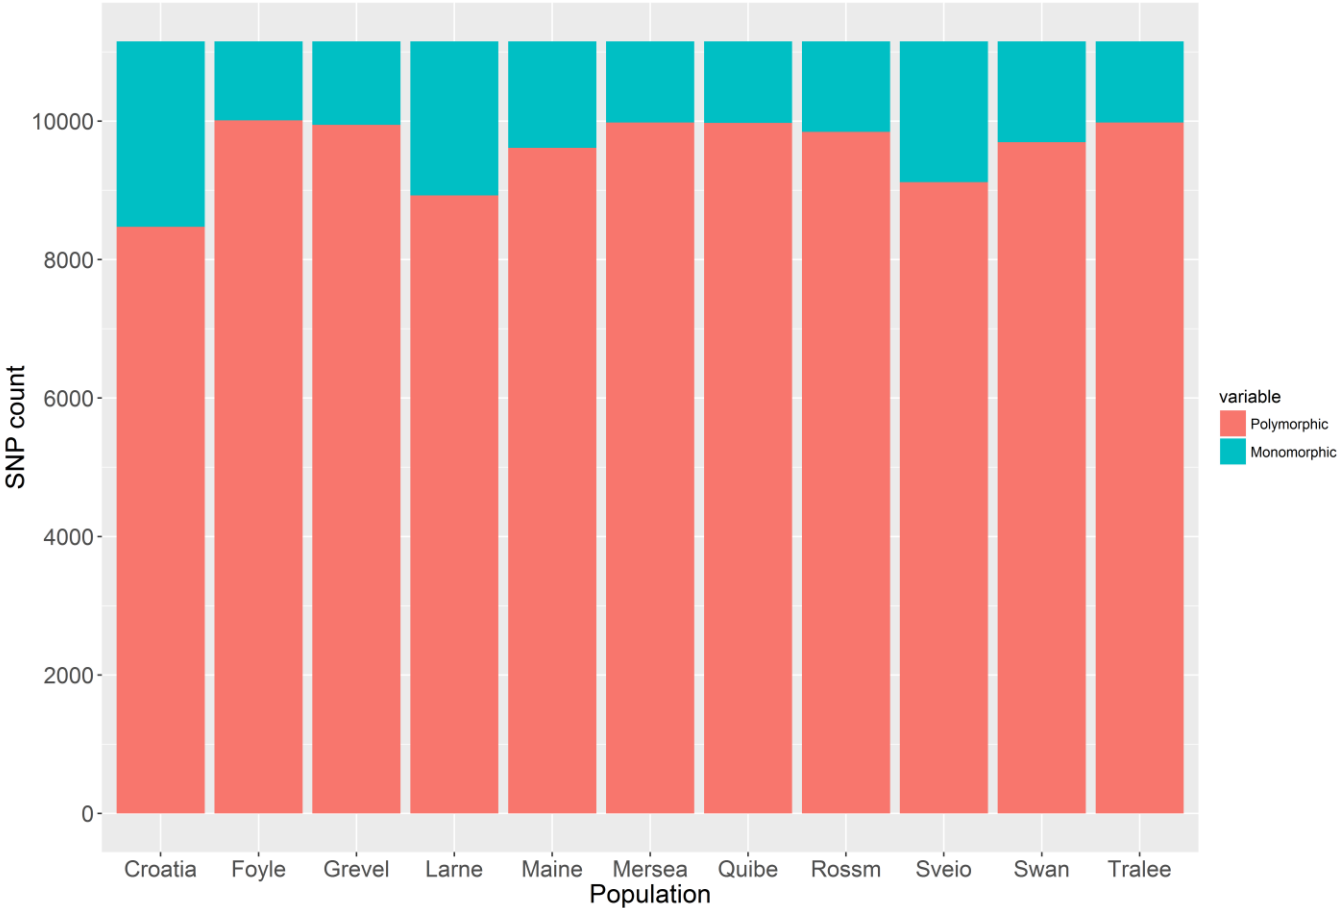

Supplement: 2209FigureS6.pdf [file 2209FigureS6.pdf]

Figure S7. Minor Allele Frequency distribution of polymorphic SNPs (MAF>0) in *O.edulis* populations

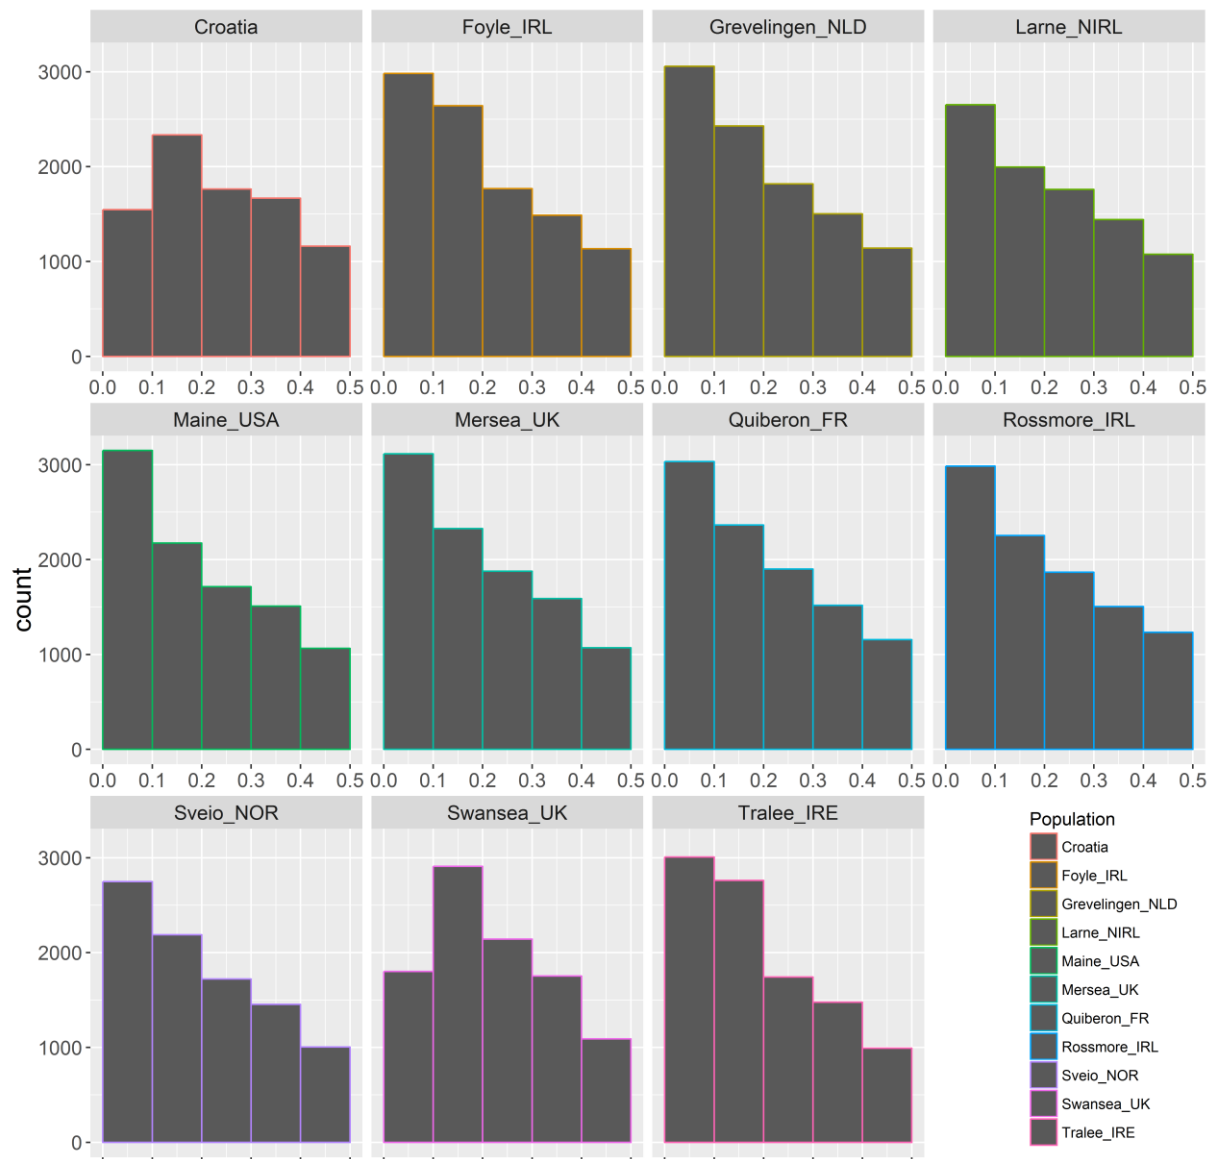

Supplement: 2209FigureS7.pdf [file 2209FigureS7.pdf]

Figure S9. Multidimensional Scaling identity-by-state plot for all *O.edulis* population samples

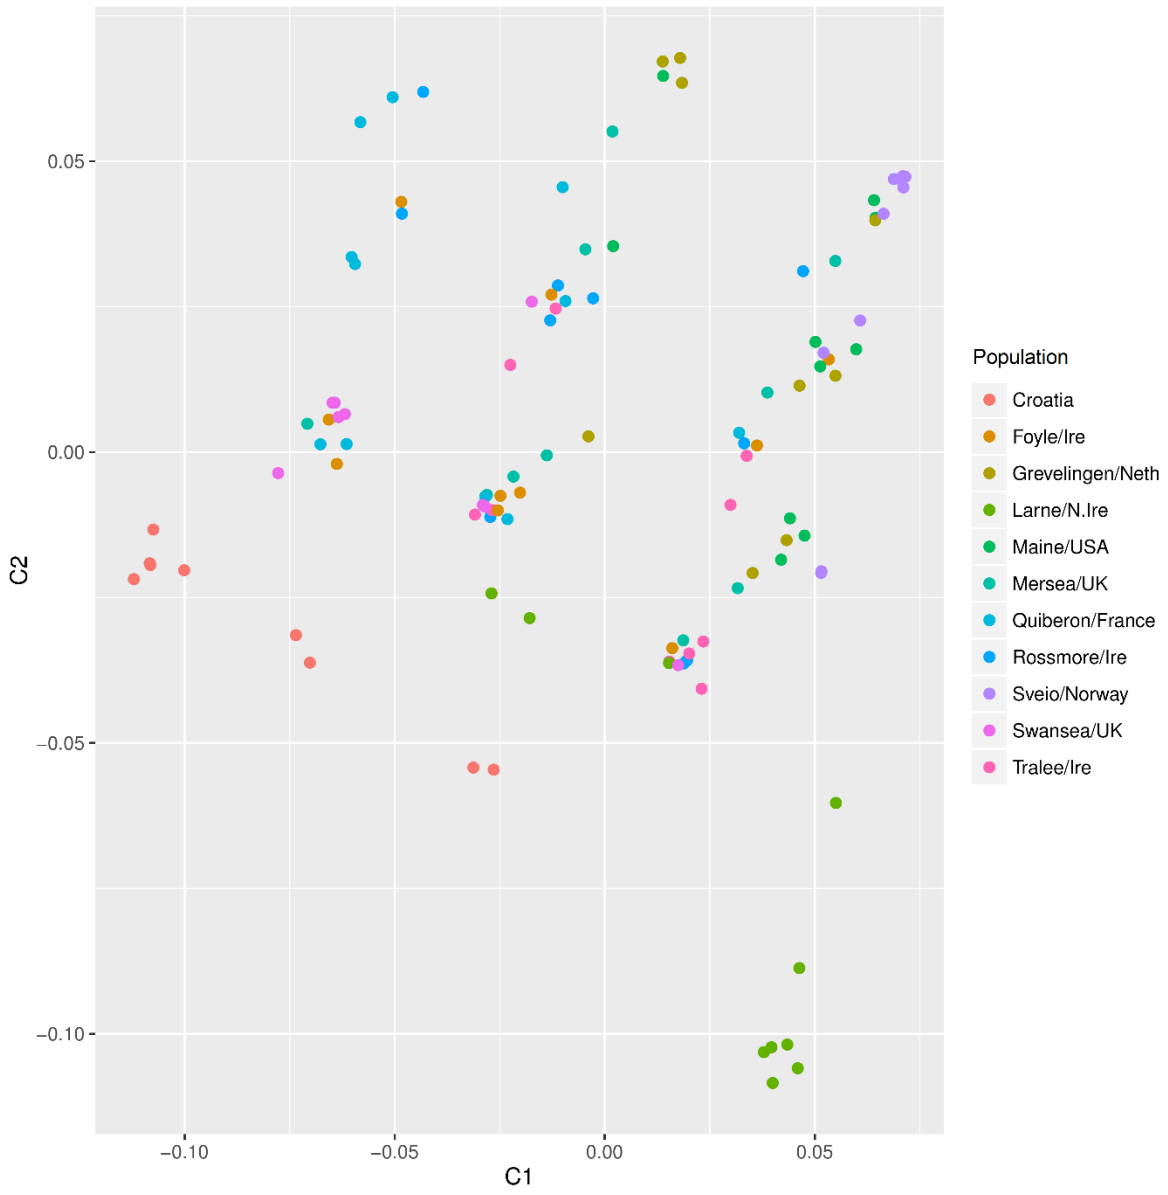

Supplement: 2209FigureS9.pdf [file 2209FigureS9.pdf]
